# Supplementary material for: l-Carnitine in omnivorous diets induces an atherogenic gut microbial pathway in humans
Source: JCI journal article supplement (doi:10.1172/jci94601), 2018-12-09
Supplement: sd1 [file 1]

# **L-Carnitine in omnivorous diets induces an atherogenic gut microbial pathway in humans**

Robert A. Koeth<sup>1,2,3</sup>, Betzabe Rachel Lam-Galvez<sup>4</sup>, Jennifer Kirsop<sup>1,2</sup>, Zeneng Wang<sup>1,2</sup>, Bruce S. Levison<sup>1</sup>, Xiaodong Gu<sup>1,2</sup>, Matthew F. Copeland<sup>4</sup>, David Bartlett<sup>1,#</sup>, David B. Cody<sup>4</sup>, Hong J. Dai<sup>5</sup>, Miranda K. Culley<sup>1,\*</sup>, Xinmin S. Li<sup>1,2</sup>, Xiaoming Fu<sup>1,2</sup>, Yuping Wu<sup>6</sup>, Lin Li<sup>1,2</sup>, Joseph A. DiDonato<sup>1,2</sup>, W. H. Wilson Tang<sup>1,2,3</sup>, Jose Carlos Garcia-Garcia<sup>4</sup> and Stanley L. Hazen<sup>1,2,3</sup>

<sup>1</sup>Department of Cellular & Molecular Medicine, Lerner Research Institute; <sup>2</sup>Center for Microbiome & Human Health; and <sup>3</sup>Department of Cardiovascular Medicine, Cleveland Clinic, Cleveland, Ohio 44195, USA.

<sup>4</sup>Life Sciences TPT, and <sup>5</sup>Global Biosciences, The Procter & Gamble Company, Cincinnati, Ohio 45040, USA.

<sup>6</sup>Department of Mathematics, Cleveland State University, Cleveland, Ohio 44115, USA.

# current address: Department of Diagnostic Radiology, Mayo Clinic, Rochester, MN 55905, USA.

\* current address: Department of Vascular Medicine Institute, University of Pittsburgh School of Medicine, Pittsburgh, PA 15213, USA.

Address for Correspondence:

Stanley L. Hazen, MD PhD

Department of Cellular & Molecular Medicine, Lerner Research Institute, Cleveland Clinic

9500 Euclid Avenue, mail code NC-10

Cleveland, OH 44195

Phone: (216) 445-9763

Fax: (216) 636-0392

E-mail: [hazens@ccf.org](mailto:hazens@ccf.org)

## **SUPPLEMENTARY DATA INDEX:**

### **SUPPLEMENTAL FIGURE LEGENDS**

- Supplemental Figure 1. (Page 3)
- Supplemental Figure 2. (Page 4)
- Supplemental Figure 3. (Page 5)
- Supplemental Figure 4. (Page 6)
- Supplemental Figure 5. (Page 7)
- Supplemental Figure 6. (Page 8)

### **SUPPLEMENTAL TABLES**

- Supplemental Table 1. (Page 9)
- Supplemental Table 2. (Page 10)
- TREND Statement Checklist. (Pages 11-13)

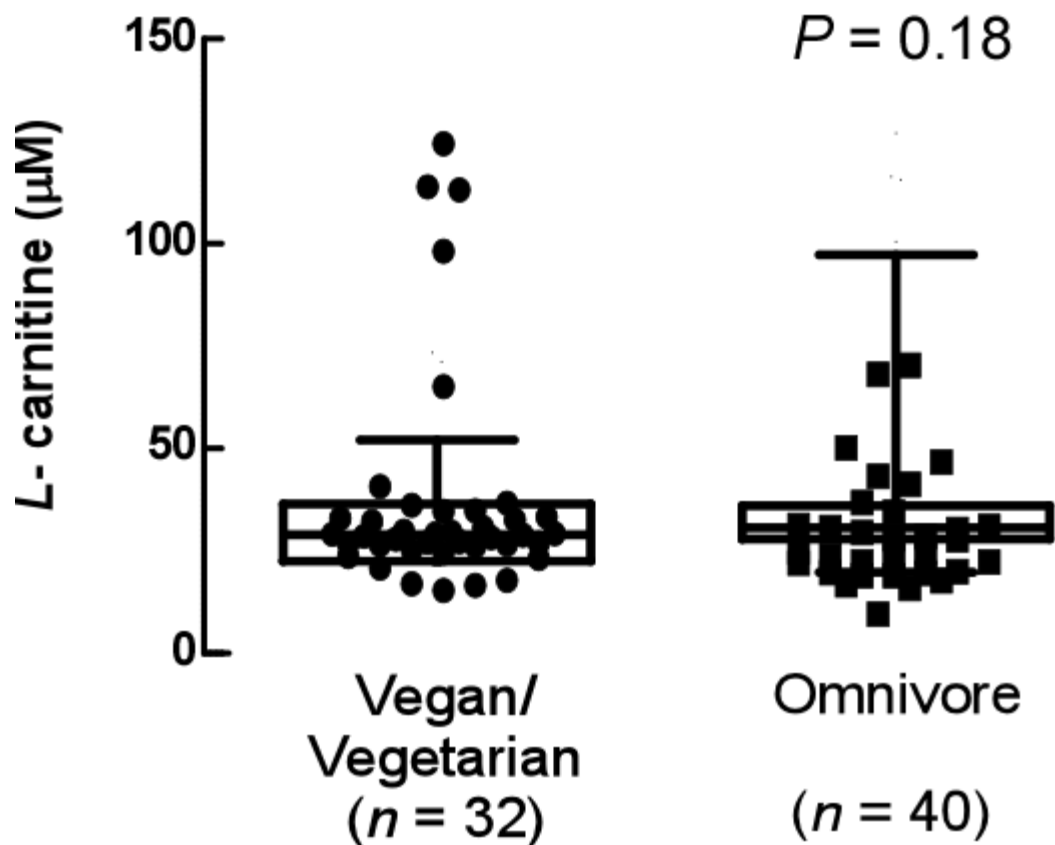

**Supplemental Figure 1. Fasting plasma concentrations of *L*-carnitine in vegans and vegetarians ( $n = 32$ ) versus omnivores ( $n = 40$ ).** Boxes represent the 25th, 50th, and 75th percentile and whiskers represent the 10th and 90th percentile. Plasma concentrations of *L*-carnitine were determined using LC/MS/MS. Wilcoxon rank sums was used to assess differences between groups.

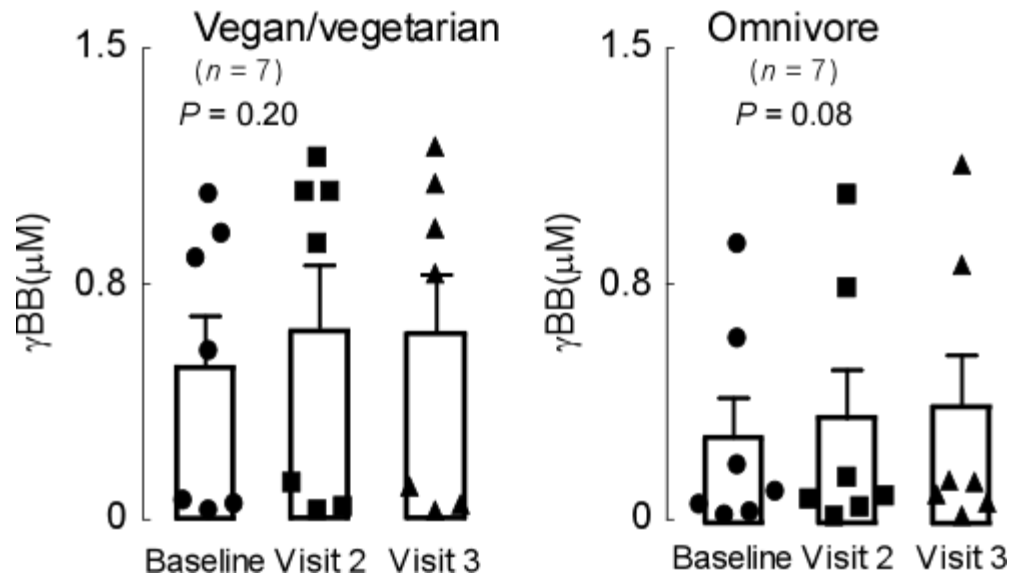

**Supplemental Figure 2. Plasma  $\gamma$ BB concentrations in *L*-carnitine supplementation study.**  $\gamma$ BB plasma concentrations in subjects ( $n = 7$  vegans/vegetarians and  $n = 7$  omnivores) at baseline, and following daily *L*-carnitine supplementation at visit 2 (Visit 2 = 1 month), and visit 3 (Visit 3 = at least 2 months). Data presented as mean  $\pm$  SEM. A repeated measures 1-way ANOVA test was used to assess differences among visits.

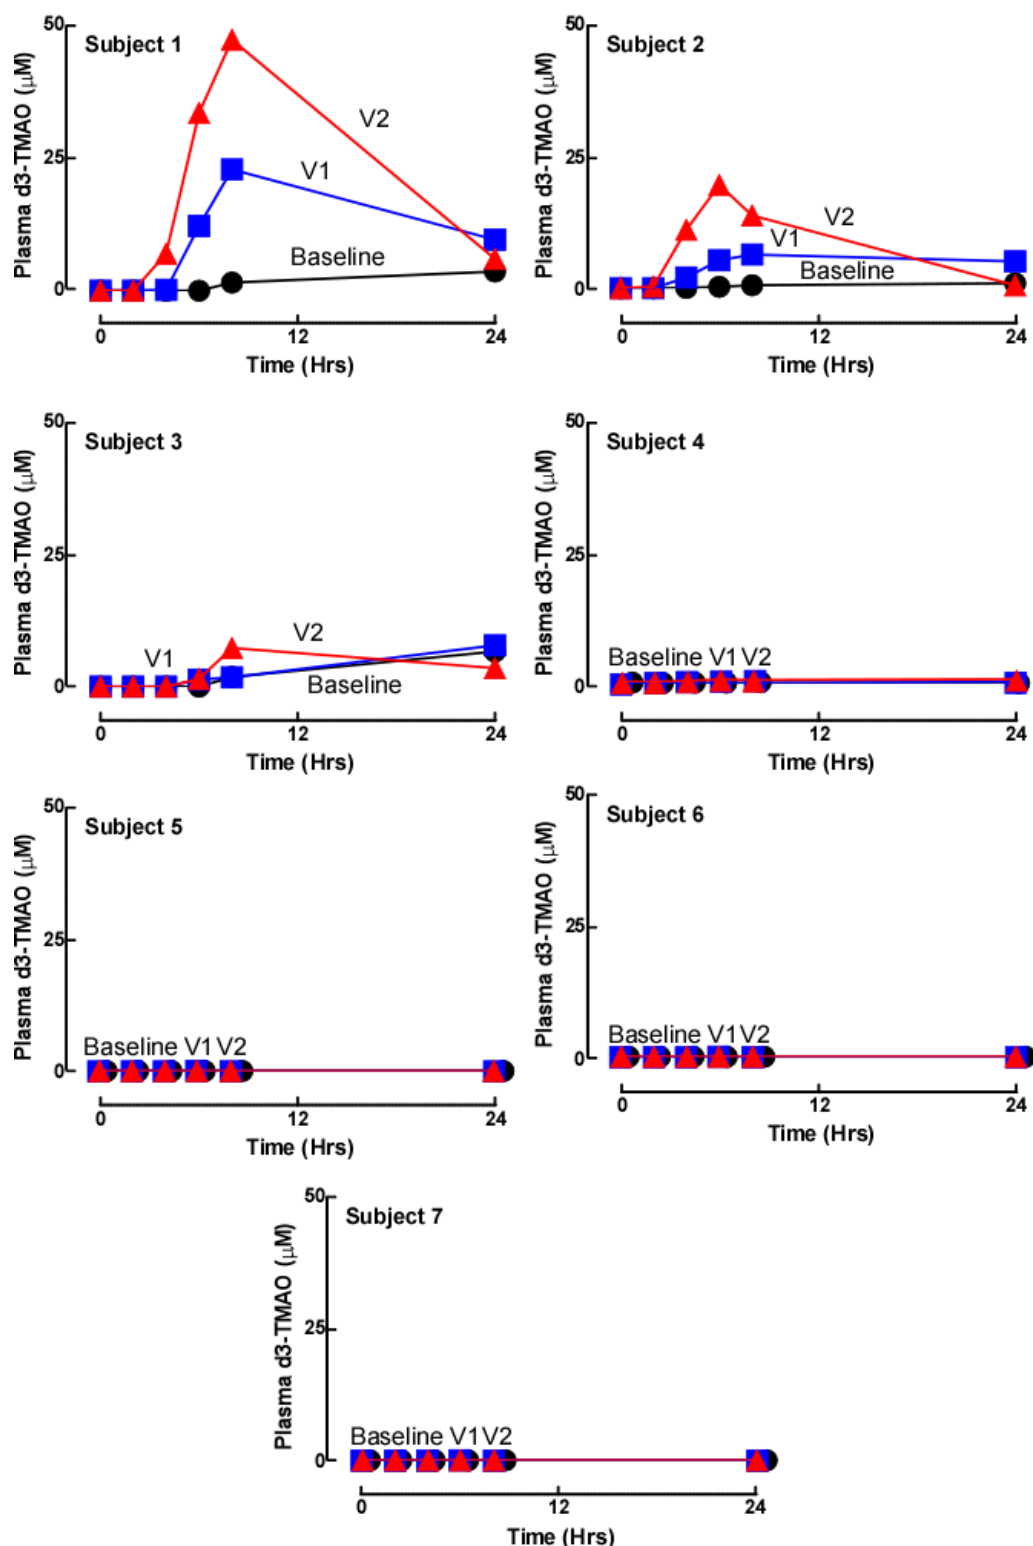

**Supplemental Figure 3. Individual plots of plasma d3-TMAO from vegan and vegetarian subjects challenged with d3-L-carnitine at baseline (black circles), visit 1 (V1 = 1 month, blue squares), and visit 2 (V2 = 2-3 months, red triangles).** Subjects are presented in decreasing magnitude of response of d3-TMAO production from d3-L-carnitine. Plasma concentrations of L-carnitine were determined using LC/MS/MS.

**A**

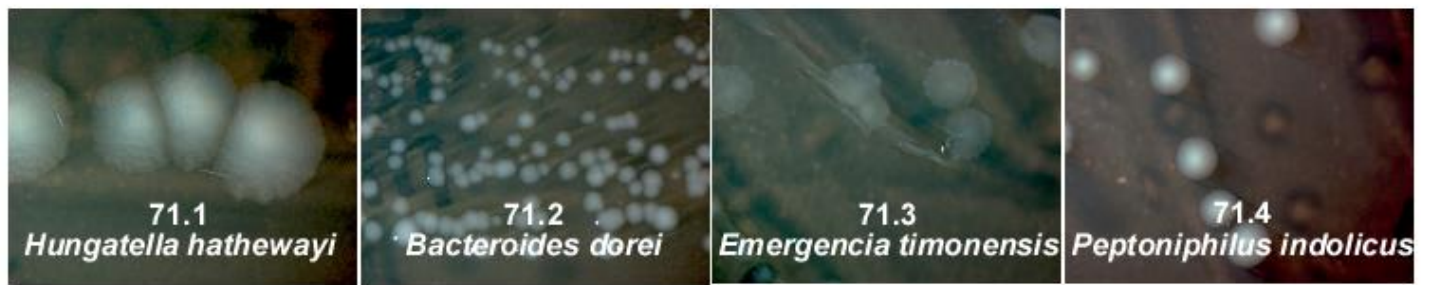

**B**

Download [GenBank](#) [Graphics](#)

Emergencia timonensis strain SN18 16S ribosomal RNA, partial sequence  
Sequence ID: [NR\\_144737.1](#) Length: 1480 Number of Matches: 1

Range 1: 1 to 516 [GenBank](#) [Graphics](#) [Next Match](#) [Previous](#)

| Score         | Expect                                                       | Identities   | Gaps      | Strand    |
|---------------|--------------------------------------------------------------|--------------|-----------|-----------|
| 942 bits(510) | 0.0                                                          | 514/516(99%) | 0/516(0%) | Plus/Plus |
| Query 4       | AGAGTTTGATCCTGGCTCAGGATGAACGCTGGCGGCGTGCCTAACACATGCAAGTCGAGC | 63           |           |           |
| Sbjct 1       | AGAGTTTGATCCTGGCTCAGGATGAACGCTGGCGGCGTGCCTAACACATGCAAGTCGAGC | 60           |           |           |
| Query 64      | GAGAAGCCATTGACTGAACTTCGGTAGAAGGATATGGTGGAAAGCGGCGGACGGGTGAG  | 123          |           |           |
| Sbjct 61      | GAGAAGCCATTGACTGAACTTCGGTAGAAGGATATGGTGGAAAGCGGCGGACGGGTGAG  | 120          |           |           |
| Query 124     | TAACGCGTAGGCAACCTGCCCCCTACAGAGGGATAGCCATTGGAAACGATGATTAACC   | 183          |           |           |
| Sbjct 121     | TAACGCGTAGGCAACCTGCCCCCTACAGAGGGATAGCCATTGGAAACGATGATTAACC   | 180          |           |           |
| Query 184     | TCATAACGCATCCCCYCACATGGAGGGGATGCCAAAGATTTCATCGGTAAGGGATGGGCC | 243          |           |           |
| Sbjct 181     | TCATAACGCATCCCCYCACATGGAGGGGATGCCAAAGATTTCATCGGTAAGGGATGGGCC | 240          |           |           |
| Query 244     | TGCGTCTGATTAGCTGTTGGCGGGGTAAAGGCCACCAAGGCGACGATCAGTAGCCGAC   | 303          |           |           |
| Sbjct 241     | TGCGTCTGATTAGCTGTTGGCGGGGTAAAGGCCACCAAGGCGACGATCAGTAGCCGAC   | 300          |           |           |
| Query 304     | CTGAGAGGGTGATCGGCCACATTGGAAGTGAAGACACGGTCCAACTCCTACGGGAGGCAG | 363          |           |           |
| Sbjct 301     | CTGAGAGGGTGATCGGCCACATTGGAAGTGAAGACACGGTCCAACTCCTACGGGAGGCAG | 360          |           |           |
| Query 364     | CAGTGGGGAATATTGCACAATGGGCGAAAGCCTGATGCAGCAACGCCGCTGAGGGATGA  | 423          |           |           |
| Sbjct 361     | CAGTGGGGAATATTGCACAATGGGCGAAAGCCTGATGCAGCAACGCCGCTGAGGGATGA  | 420          |           |           |
| Query 424     | AGGCCTTCGGGTCGTAAACCTCTGTCTTGGGGAAGAAACAATGACGGTACCCATGGAG   | 483          |           |           |
| Sbjct 421     | AGGCCTTCGGGTCGTAAACCTCTGTCTTGGGGAAGAAACAATGACGGTACCCATGGAG   | 480          |           |           |
| Query 484     | GAAGCCCCGGCTAACTACGTGCCAGCAGCCGCGGTA                         | 519          |           |           |
| Sbjct 481     | GAAGCCCCGGCTAACTACGTGCCAGCAGCCGCGGTA                         | 516          |           |           |

**Supplemental Figure 4. (A)** Characterization of SP2-71 revealed the presence of 4 microbes: *Hungatella hathewayi*, *Bacteroides dorei*, *Emergencia timonensis*, and *Peptoniphilus indolicus*. **(B)** 16S-rRNA Sequence alignment of strain SP2-71.3 from this study with *Emergencia timonensis* SN18 showing 99% sequence identity.

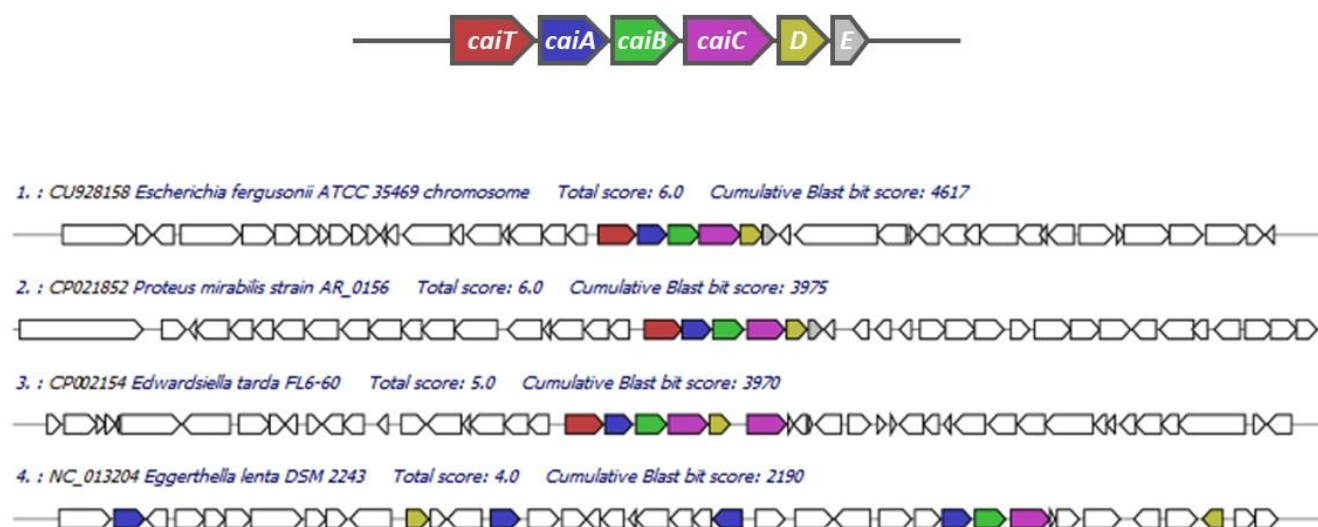

**Supplemental Figure 5. Comparative genomics analysis of CaitTABCDE genes in organism found to utilize *L*-carnitine under anaerobic conditions.**

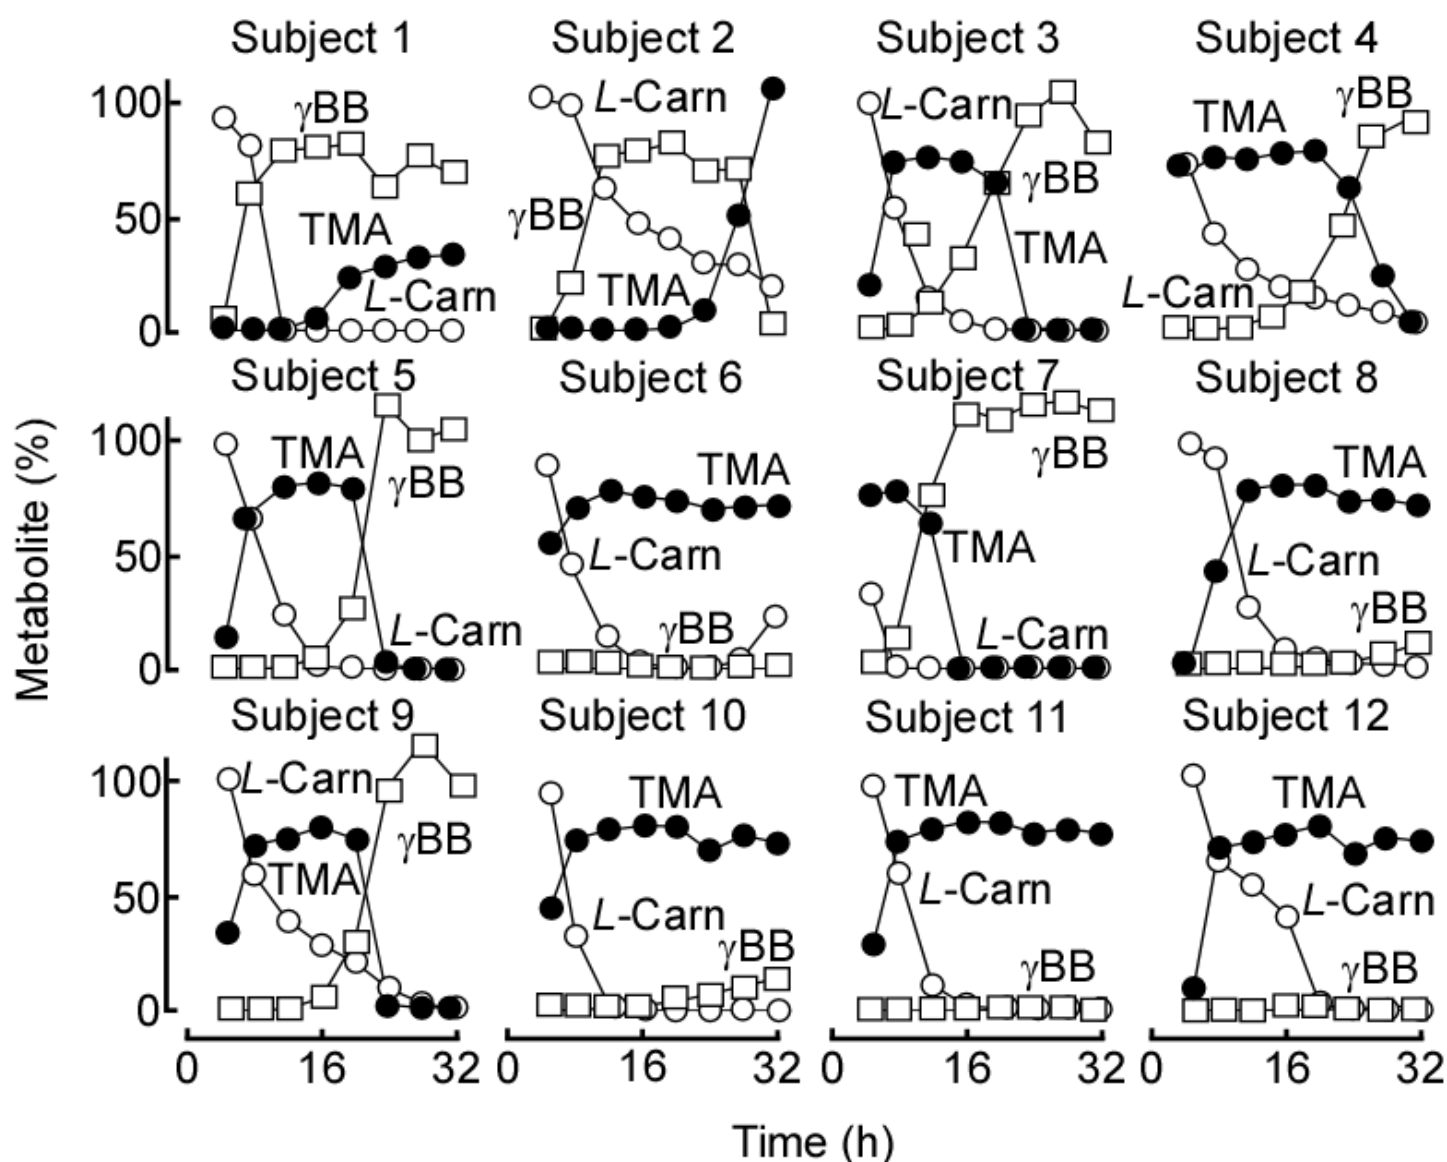

**Supplemental Figure 6.** Anaerobic microbial *L*-carnitine catabolism generates  $\gamma$ BB as an intermediate. Human fecal communities from 12 different donors including subjects presented in Figure 9B were studied for their *L*-carnitine  $\rightarrow$   $\gamma$ BB  $\rightarrow$  TMA transformation activity with sampling every 4 h for 32 h. Concentrations of *L*-carnitine (open circles),  $\gamma$ BB (open squares) and TMA (filled circles) were determined by stable isotope dilution LC/MS/MS. Each point represents  $n=2$  replicates.

| Pool | Best match species*          | Number of isolates | % of isolates | Isolates                                                                                                                                                                                                 |
|------|------------------------------|--------------------|---------------|----------------------------------------------------------------------------------------------------------------------------------------------------------------------------------------------------------|
| SP1  | <i>Peptoniphilus harei</i>   | 52                 | 57%           | 1, 2, 3, 6, 7, 8, 9, 10, 11, 13, 15, 16, 17, 19, 21, 23, 27, 28, 29, 30, 34, 36, 37, 38, 40, 43, 44, 45, 46, 47, 48, 50, 51, 52, 53, 55, 57, 59, 64, 67, 69, 70, 72, 80, 82, 83, 85, 86, 87, 89, 90, 100 |
| SP2  | <i>Clostridium hathewayi</i> | 27                 | 29%           | 4, 14, 18, 20, 22, 24, 25, 31, 35, 39, 41, 42, 49, 58, 63, 65, 66, 68, 71, 75, 78, 81, 88, 91, 92, 93, 94                                                                                                |
| SP3  | <i>Clostridium hylemonae</i> | 3                  | 3%            | 32, 60, 74                                                                                                                                                                                               |
| SP4  | <i>Bacteroides vulgatus</i>  | 2                  | 2%            | 33, 54                                                                                                                                                                                                   |
| SP5  | no reliable identification   | 8                  | 9%            | 56, 61, 62, 79, 84, 96, 97, 98                                                                                                                                                                           |

\* best match from MALDI-TOF MS analysis using a BioTyper.

**Supplemental Table 1. Microbial isolates comprising species pools for isolation of organisms involved in anaerobic *L*-carnitine catabolism.**

| Characteristics                | Vegan/Vegetarian<br>(n=10) | Omnivore<br>(n=17) | P    |
|--------------------------------|----------------------------|--------------------|------|
| Age (yrs)                      | 43 $\pm$ 18                | 43 $\pm$ 15        | 0.92 |
| Sex (male, %)                  | 50                         | 47                 | 0.88 |
| Race                           |                            |                    |      |
| Caucasian (%)                  | 80                         | 76                 | 0.83 |
| African American (%)           | 0                          | 18                 | 0.16 |
| Hispanic (%)                   | 10                         | 0                  | 0.18 |
| Asian (%)                      | 10                         | 6                  | 0.70 |
| BMI (kg/m <sup>2</sup> )       | 25 $\pm$ 3.2               | 27 $\pm$ 4         | 0.58 |
|                                |                            |                    |      |
| <b>Comorbidities</b>           |                            |                    |      |
| HPL (%)                        | 10                         | 29                 | 0.24 |
| HTN (%)                        | 0                          | 35                 | 0.03 |
| Hx of Diabetes (%)             | 0                          | 6                  | 0.43 |
| Hx of cancer (%)               | 10                         | 0                  | 0.18 |
| Hx of MI, stroke, PCI, CHF (%) | 0                          | 0                  | N/A  |
|                                |                            |                    |      |
| <b>Medications</b>             |                            |                    |      |
| Aspirin (%)                    | 20                         | 15                 | 0.56 |
| Beta blockers (%)              | 0                          | 7                  | 0.26 |
| Statin (%)                     | 10                         | 29                 | 0.22 |
| ACEI/ARB (%)                   | 0                          | 12                 | 0.26 |
| Diuretic (%)                   | 10                         | 4                  | 0.69 |
| Calcium channel blocker (%)    | 10                         | 6                  | 0.69 |
| Fish oil (%)                   | 0                          | 11                 | 0.16 |

HPL= hyperlipidemia, HTN =hypertension, MI = Myocardial infarction, PCI=percutaneous coronary intervention, CHF=congestive heart failure, ACEI =angiotensin converting enzyme inhibitors, ARB = Angiotensin II receptor blockers

**Supplemental Table 2: Baseline characteristics, comorbidities, and medications for subjects used in isotopologue challenge studies.** Values represent means  $\pm$  SD or proportions expressed as a percentage (%) in the respective groups. Comparisons for means were completed using a Mann Whitney (Wilcoxon-Rank Sum test) and proportions were compared using a Pearson's chi-square test ( $X^2$ ).

## TREND Statement Checklist

| Paper Section/<br>Topic                                             | Item No | Descriptor                                                                                                                                     | Reported?                                                                           |           |
|---------------------------------------------------------------------|---------|------------------------------------------------------------------------------------------------------------------------------------------------|-------------------------------------------------------------------------------------|-----------|
|                                                                     |         |                                                                                                                                                | 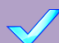 | Pg #      |
| Title and Abstract                                                  |         |                                                                                                                                                |                                                                                     |           |
| Title and Abstract                                                  | 1       | • Information on how unit were allocated to interventions                                                                                      | ✓                                                                                   | 2         |
|                                                                     |         | • Structured abstract recommended                                                                                                              | ✓                                                                                   | 2         |
|                                                                     |         | • Information on target population or study sample                                                                                             | ✓                                                                                   | 2         |
| Introduction                                                        |         |                                                                                                                                                |                                                                                     |           |
| Background                                                          | 2       | • Scientific background and explanation of rationale                                                                                           | ✓                                                                                   | 3-5       |
|                                                                     |         | • Theories used in designing behavioral interventions                                                                                          | ✓                                                                                   | 3-5       |
| Methods                                                             |         |                                                                                                                                                |                                                                                     |           |
| Participants                                                        | 3       | • Eligibility criteria for participants, including criteria at different levels in recruitment/sampling plan (e.g., cities, clinics, subjects) | ✓                                                                                   | 19-21     |
|                                                                     |         | • Method of recruitment (e.g., referral, self-selection), including the sampling method if a systematic sampling plan was implemented          | ✓                                                                                   | 19-21     |
|                                                                     |         | • Recruitment setting                                                                                                                          | ✓                                                                                   | 19-21     |
|                                                                     |         | • Settings and locations where the data were collected                                                                                         | ✓                                                                                   | 19-21     |
| Interventions                                                       | 4       | • Details of the interventions intended for each study condition and how and when they were actually administered, specifically including:     | ✓                                                                                   | 19-21     |
|                                                                     |         | ○ Content: what was given?                                                                                                                     | ✓                                                                                   | 19-21     |
|                                                                     |         | ○ Delivery method: how was the content given?                                                                                                  | ✓                                                                                   | 19-21     |
|                                                                     |         | ○ Unit of delivery: how were the subjects grouped during delivery?                                                                             | ✓                                                                                   | 19-21     |
|                                                                     |         | ○ Deliverer: who delivered the intervention?                                                                                                   | ✓                                                                                   | 19-21     |
|                                                                     |         | ○ Setting: where was the intervention delivered?                                                                                               | ✓                                                                                   | 19-21     |
|                                                                     |         | ○ Exposure quantity and duration: how many sessions or episodes or events were intended to be delivered? How long were they intended to last?  | ✓                                                                                   | 19-21     |
|                                                                     |         | ○ Time span: how long was it intended to take to deliver the intervention to each unit?                                                        | ✓                                                                                   | 19-21     |
| ○ Activities to increase compliance or adherence (e.g., incentives) | ✓       | 20                                                                                                                                             |                                                                                     |           |
| Objectives                                                          | 5       | • Specific objectives and hypotheses                                                                                                           | ✓                                                                                   | 3-5       |
| Outcomes                                                            | 6       | • Clearly defined primary and secondary outcome measures                                                                                       | ✓                                                                                   | 19-21     |
|                                                                     |         | • Methods used to collect data and any methods used to enhance the quality of measurements                                                     | ✓                                                                                   | 19-21     |
|                                                                     |         | • Information on validated instruments such as psychometric and biometric properties                                                           | ✓                                                                                   | 19        |
| Sample Size                                                         | 7       | • How sample size was determined and, when applicable, explanation of any interim analyses and stopping rules                                  | ✓                                                                                   | 19-21     |
| Assignment Method                                                   | 8       | • Unit of assignment (the unit being assigned to study condition, e.g., individual, group, community)                                          | ✓                                                                                   | 19-21     |
|                                                                     |         | • Method used to assign units to study conditions, including details of any restriction (e.g., blocking, stratification, minimization)         | ✓                                                                                   | 19-21     |
|                                                                     |         | • Inclusion of aspects employed to help minimize potential bias induced due to non-randomization (e.g., matching)                              | ✓                                                                                   | 19-21, 18 |

## TREND Statement Checklist

|                      |    |                                                                                                                                                                                                                                                                                        |   |            |
|----------------------|----|----------------------------------------------------------------------------------------------------------------------------------------------------------------------------------------------------------------------------------------------------------------------------------------|---|------------|
| Blinding (masking)   | 9  | <ul style="list-style-type: none"><li>Whether or not participants, those administering the interventions, and those assessing the outcomes were blinded to study condition assignment; if so, statement regarding how the blinding was accomplished and how it was assessed.</li></ul> | ✓ | 20         |
| Unit of Analysis     | 10 | <ul style="list-style-type: none"><li>Description of the smallest unit that is being analyzed to assess intervention effects (e.g., individual, group, or community)</li></ul>                                                                                                         | ✓ | 19-21      |
|                      |    | <ul style="list-style-type: none"><li>If the unit of analysis differs from the unit of assignment, the analytical method used to account for this (e.g., adjusting the standard error estimates by the design effect or using multilevel analysis)</li></ul>                           | ✓ | 6-14, 24   |
| Statistical Methods  | 11 | <ul style="list-style-type: none"><li>Statistical methods used to compare study groups for primary methods outcome(s), including complex methods of correlated data</li></ul>                                                                                                          | ✓ | 24         |
|                      |    | <ul style="list-style-type: none"><li>Statistical methods used for additional analyses, such as a subgroup analyses and adjusted analysis</li></ul>                                                                                                                                    | ✓ | 24         |
|                      |    | <ul style="list-style-type: none"><li>Methods for imputing missing data, if used</li></ul>                                                                                                                                                                                             | ✓ | 24         |
|                      |    | <ul style="list-style-type: none"><li>Statistical software or programs used</li></ul>                                                                                                                                                                                                  | ✓ | 24         |
| Results              |    |                                                                                                                                                                                                                                                                                        |   |            |
| Participant flow     | 12 | <ul style="list-style-type: none"><li>Flow of participants through each stage of the study: enrollment, assignment, allocation, and intervention exposure, follow-up, analysis (a diagram is strongly recommended)</li></ul>                                                           | ✓ | 19-21      |
|                      |    | <ul style="list-style-type: none"><li><ul style="list-style-type: none"><li>Enrollment: the numbers of participants screened for eligibility, found to be eligible or not eligible, declined to be enrolled, and enrolled in the study</li></ul></li></ul>                             | ✓ | 19-21      |
|                      |    | <ul style="list-style-type: none"><li><ul style="list-style-type: none"><li>Assignment: the numbers of participants assigned to a study condition</li></ul></li></ul>                                                                                                                  | ✓ | 19-21      |
|                      |    | <ul style="list-style-type: none"><li><ul style="list-style-type: none"><li>Allocation and intervention exposure: the number of participants assigned to each study condition and the number of participants who received each intervention</li></ul></li></ul>                        | ✓ | 19-21      |
|                      |    | <ul style="list-style-type: none"><li><ul style="list-style-type: none"><li>Follow-up: the number of participants who completed the follow-up or did not complete the follow-up (i.e., lost to follow-up), by study condition</li></ul></li></ul>                                      | ✓ | 19-21      |
|                      |    | <ul style="list-style-type: none"><li><ul style="list-style-type: none"><li>Analysis: the number of participants included in or excluded from the main analysis, by study condition</li></ul></li></ul>                                                                                | ✓ | 19-21      |
|                      |    | <ul style="list-style-type: none"><li>Description of protocol deviations from study as planned, along with reasons</li></ul>                                                                                                                                                           | ✓ | 19-21      |
| Recruitment          | 13 | <ul style="list-style-type: none"><li>Dates defining the periods of recruitment and follow-up</li></ul>                                                                                                                                                                                | ✓ | 19-21      |
| Baseline Data        | 14 | <ul style="list-style-type: none"><li>Baseline demographic and clinical characteristics of participants in each study condition</li></ul>                                                                                                                                              | ✓ | Supp Tbl 2 |
|                      |    | <ul style="list-style-type: none"><li>Baseline characteristics for each study condition relevant to specific disease prevention research</li></ul>                                                                                                                                     | ✓ | Supp Tbl2  |
|                      |    | <ul style="list-style-type: none"><li>Baseline comparisons of those lost to follow-up and those retained, overall and by study condition</li></ul>                                                                                                                                     | ✓ | Supp Tbl2  |
|                      |    | <ul style="list-style-type: none"><li>Comparison between study population at baseline and target population of interest</li></ul>                                                                                                                                                      | ✓ | Supp Tbl2  |
| Baseline equivalence | 15 | <ul style="list-style-type: none"><li>Data on study group equivalence at baseline and statistical methods used to control for baseline differences</li></ul>                                                                                                                           | ✓ | Supp Tbl2  |

## TREND Statement Checklist

|                         |    |                                                                                                                                                                                                                                                                                |   |       |
|-------------------------|----|--------------------------------------------------------------------------------------------------------------------------------------------------------------------------------------------------------------------------------------------------------------------------------|---|-------|
| Numbers analyzed        | 16 | • Number of participants (denominator) included in each analysis for each study condition, particularly when the denominators change for different outcomes; statement of the results in absolute numbers when feasible                                                        | ✓ | 19-21 |
|                         |    | • Indication of whether the analysis strategy was “intention to treat” or, if not, description of how non-compliers were treated in the analyses                                                                                                                               | ✓ | 20    |
| Outcomes and estimation | 17 | • For each primary and secondary outcome, a summary of results for each estimation study condition, and the estimated effect size and a confidence interval to indicate the precision                                                                                          | ✓ | 6-14  |
|                         |    | • Inclusion of null and negative findings                                                                                                                                                                                                                                      | ✓ | 6-14  |
|                         |    | • Inclusion of results from testing pre-specified causal pathways through which the intervention was intended to operate, if any                                                                                                                                               | ✓ | 6-14  |
| Ancillary analyses      | 18 | • Summary of other analyses performed, including subgroup or restricted analyses, indicating which are pre-specified or exploratory                                                                                                                                            | ✓ | 19-21 |
| Adverse events          | 19 | • Summary of all important adverse events or unintended effects in each study condition (including summary measures, effect size estimates, and confidence intervals)                                                                                                          | ✓ | 19-21 |
| <b>DISCUSSION</b>       |    |                                                                                                                                                                                                                                                                                |   |       |
| Interpretation          | 20 | • Interpretation of the results, taking into account study hypotheses, sources of potential bias, imprecision of measures, multiplicative analyses, and other limitations or weaknesses of the study                                                                           | ✓ | 14-18 |
|                         |    | • Discussion of results taking into account the mechanism by which the intervention was intended to work (causal pathways) or alternative mechanisms or explanations                                                                                                           | ✓ | 14-18 |
|                         |    | • Discussion of the success of and barriers to implementing the intervention, fidelity of implementation                                                                                                                                                                       | ✓ | 14-18 |
|                         |    | • Discussion of research, programmatic, or policy implications                                                                                                                                                                                                                 | ✓ | 14-18 |
| Generalizability        | 21 | • Generalizability (external validity) of the trial findings, taking into account the study population, the characteristics of the intervention, length of follow-up, incentives, compliance rates, specific sites/settings involved in the study, and other contextual issues | ✓ | 18    |
| Overall Evidence        | 22 | • General interpretation of the results in the context of current evidence and current theory                                                                                                                                                                                  | ✓ | 14-18 |

From: Des Jarlais, D. C., Lyles, C., Crepaz, N., & the Trend Group (2004). Improving the reporting quality of nonrandomized evaluations of behavioral and public health interventions: The TREND statement. *American Journal of Public Health*, 94, 361-366. For more information, visit: <http://www.cdc.gov/trendstatement/>
